# Supplementary material for: Porous CeNiO3 with an enhanced electrochemical performance and prolonged cycle life (>50 000 cycles) via a lemon-assisted sol–gel autocombustion method
Source: Royal Society of Chemistry journal article supplement (doi:10.1039/d2nj02295h), 2022-01-01
Supplement: d2nj02295h1.pdf [file d2nj02295h1.pdf]

## Supplementary information

# **Porous CeNiO<sub>3</sub> with enhanced electrochemical performance and prolonged cycle life (> 50000 cycles) via lemon-assisted sol-gel auto combustion method.**

M.P. Harikrishnan, A. Chandra Bose\*

Nanomaterials Laboratory, Department of Physics, National Institute of Technology,  
Tiruchirappalli, Tamilnadu, India, 620015

\*Email id: [acbose@nitt.edu](mailto:acbose@nitt.edu)

### **Corresponding Author:**

A. Chandra Bose

Professor

Department of Physics

National Institute of Technology Tiruchirappalli

Tiruchirappalli, Thuvakudi P.O-620015

Tamilnadu, India

Tel: +91 (0) 431 2503605

Email id: [acbose@nitt.edu](mailto:acbose@nitt.edu)

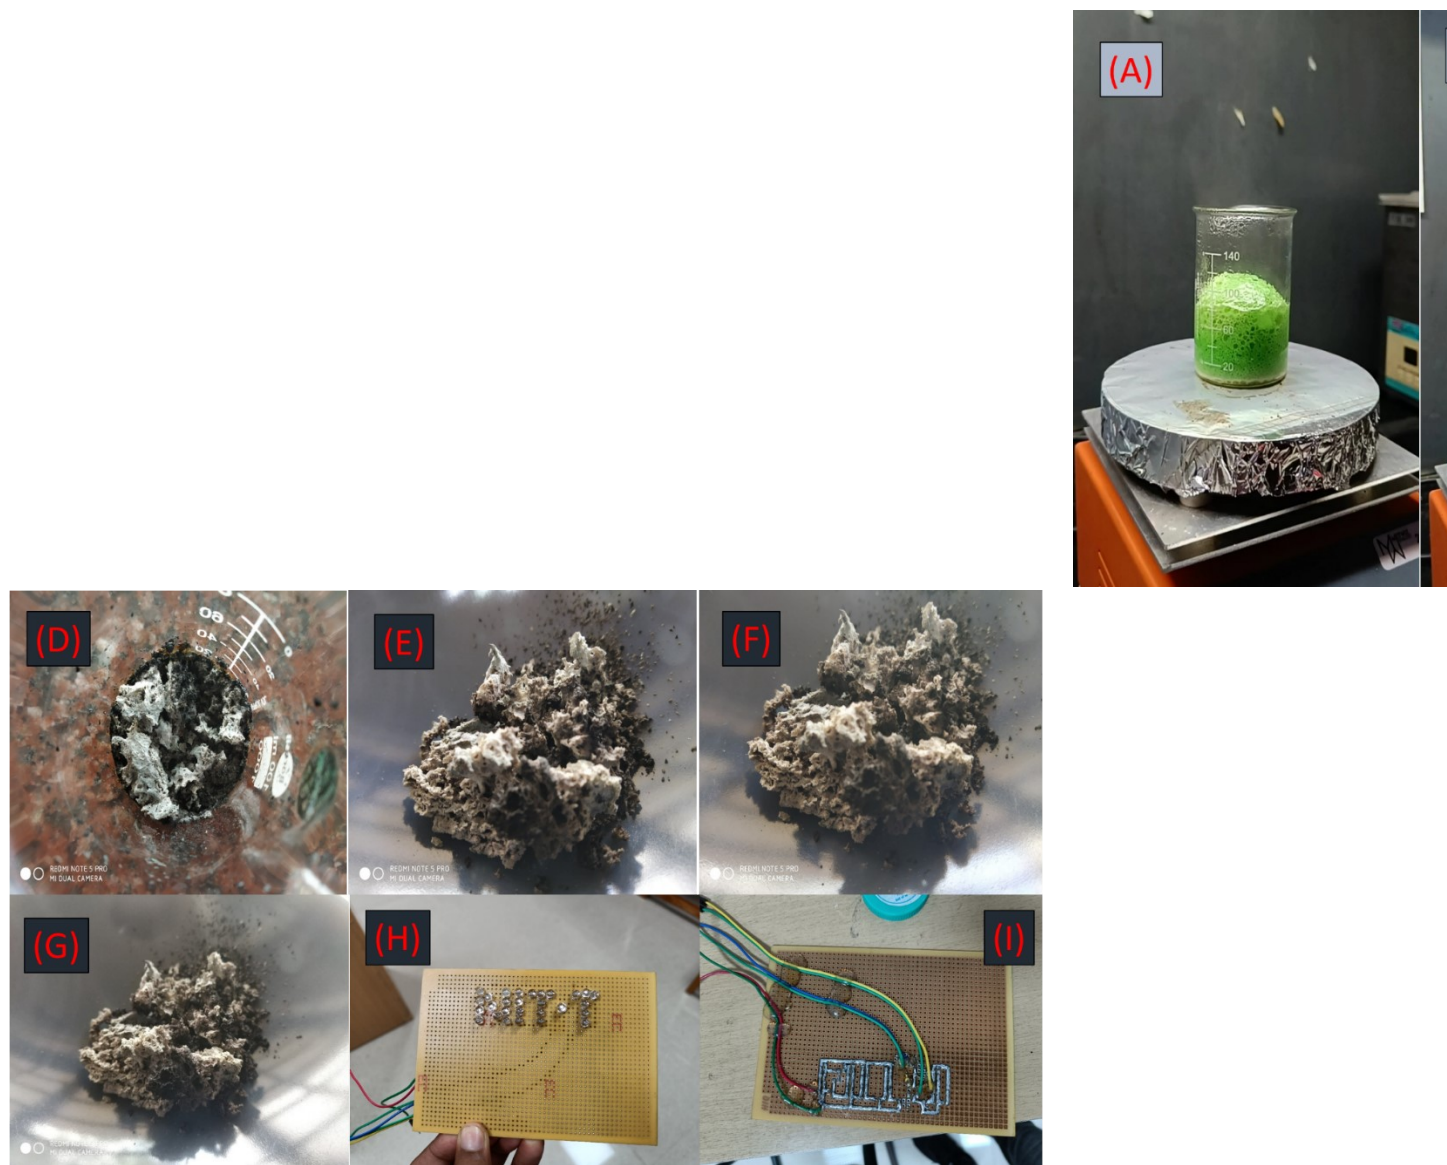

**Fig. S1.** (A-C) Photograph of bubbling and auto combustion during synthesis, (D-G) fully combusted samples, and (H-I) an array of LEDs arranged in a way to display “NITT” on to a PCB.

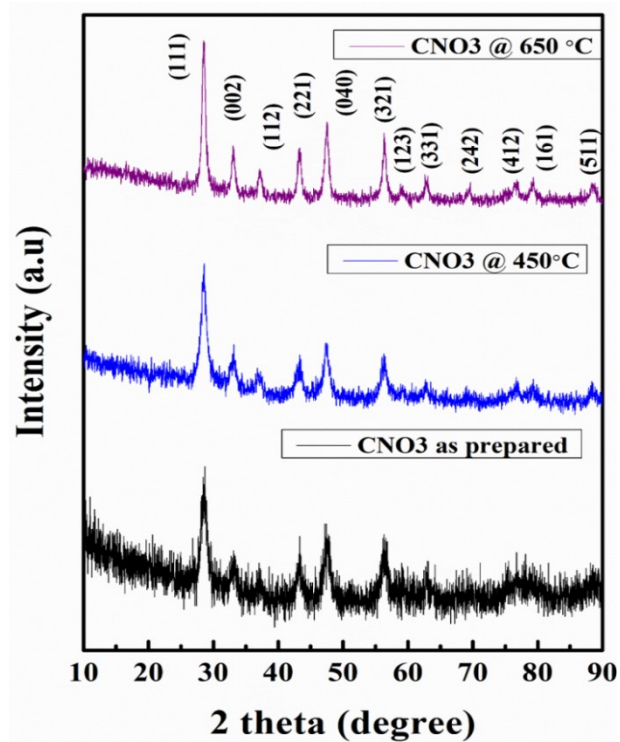

**Fig. S2.** XRD patterns of as prepared sample, sample annealed at 450 °C, and 650 °C of CNO3 material.

**Table S1.** Resistance value, surface area, specific capacity and cyclic stability of CNO electrodes in three-electrode system.

| Sample | Surface area | Pore volume | Maximum Specific capacity   |                              | Rs     | Rct    | Cyclic stability |
|--------|--------------|-------------|-----------------------------|------------------------------|--------|--------|------------------|
|        |              |             | CV<br>(2mVs <sup>-1</sup> ) | GCD<br>(1 Ag <sup>-1</sup> ) |        |        |                  |
| CNO1   | 17.00        | 2.421       | 239.12                      | 242.54                       | 1.0962 | 1.4436 | 99.48            |
| CNO2   | 38.57        | 3.559       | 531.63                      | 589.33                       | 0.6551 | 0.9549 | 100.79           |
| CNO3   | 56.58        | 3.586       | 598.51                      | 605                          | 0.4718 | 0.8702 | 102.69           |
| CNO4   | 44.26        | 3.964       | 516.56                      | 591.25                       | 0.7410 | 0.7218 | 100.81           |

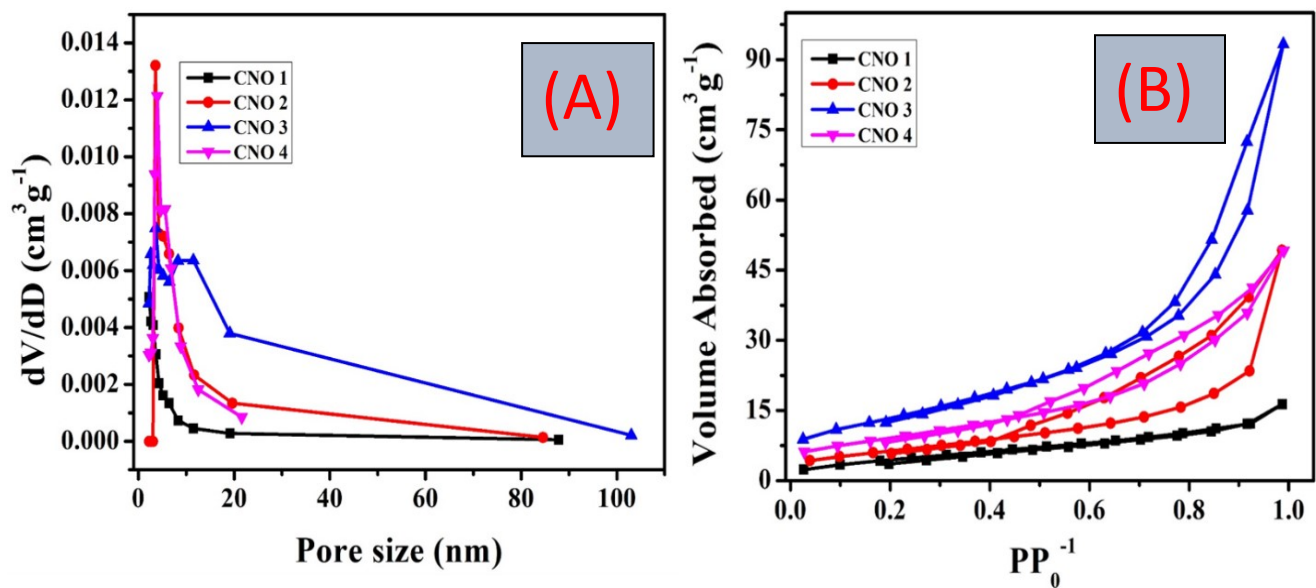

**Fig. S3.** (A)  $N_2$  adsorption-desorption isotherms, and (B) BJH pore size distributions of CNO1, CNO2, CNO3, and CNO4.

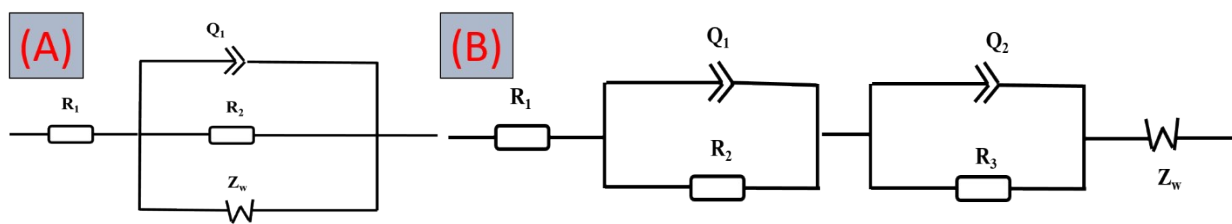

**Fig.S4.** Equivalent fitted circuit of (A) CNO3 electrode in 3 electrode system (B) symmetric cell

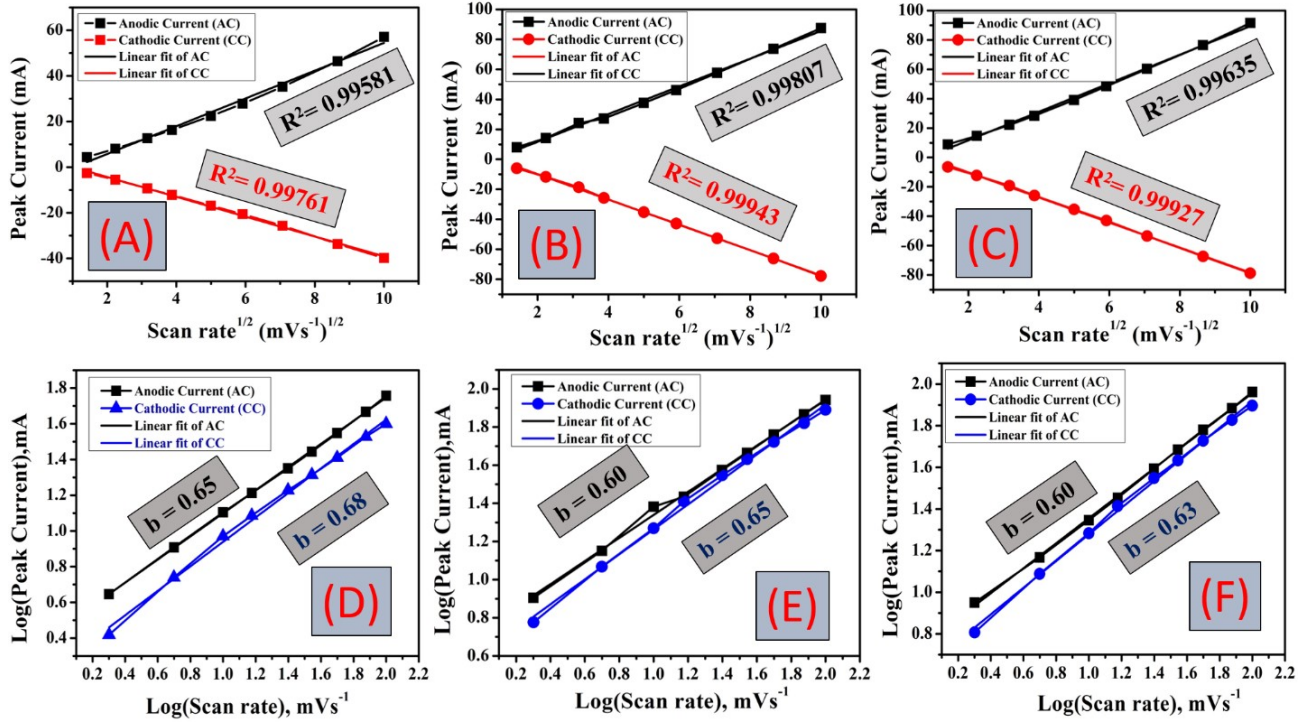

**Fig. S5.** (A-C) The variation of cathodic/anodic peak currents for the CNO1, CNO2, and CNO4 electrodes as a function of the square root of scan rates; (D-E) The relationship between  $\log(i_p)$  and  $\log(v)$  for the CNO1, CNO2, and CNO4 electrodes.

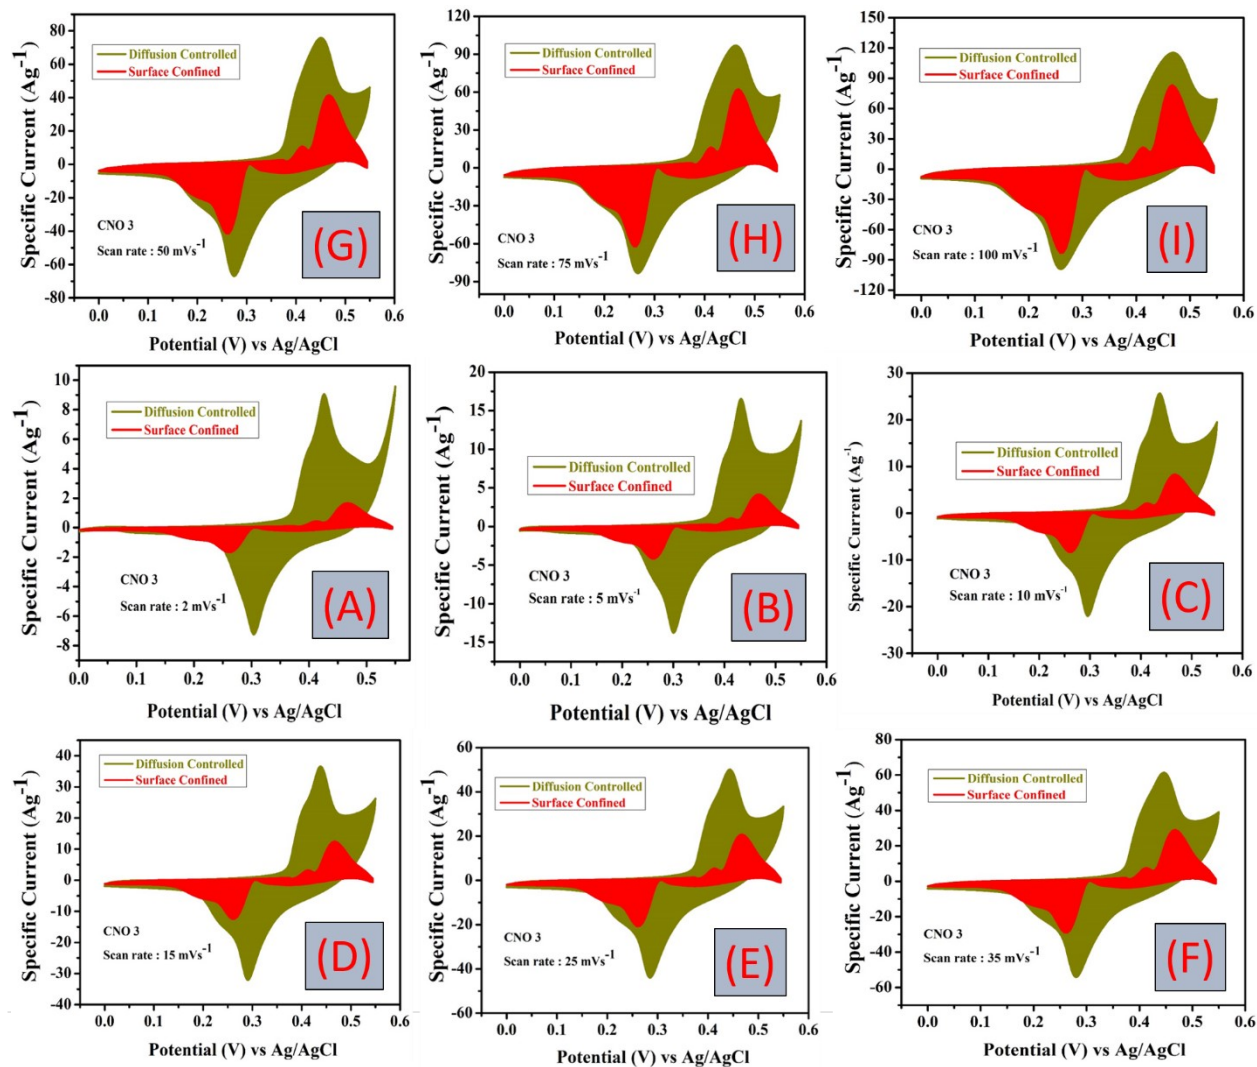

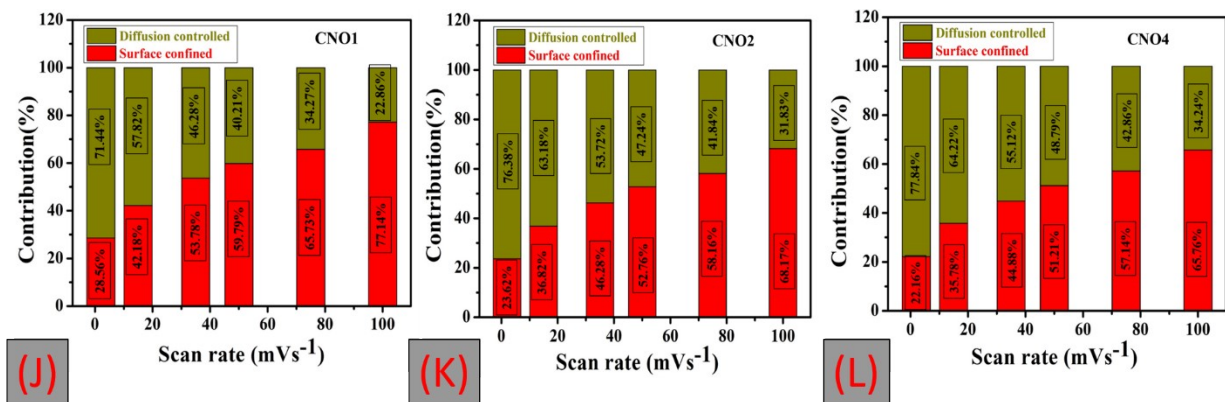

**Fig. S6.** (A-I) Surface-confined (red region) and diffusion-controlled (green region) contribution to charge storage of CNO3 electrode at different scan rates from 2-100 mVs<sup>-1</sup>, (J-L) Surface-confined (green region) and diffusion-controlled (red region) contribution to charge storage of the CNO1, CNO2, and CNO4 electrodes at different scan rates.

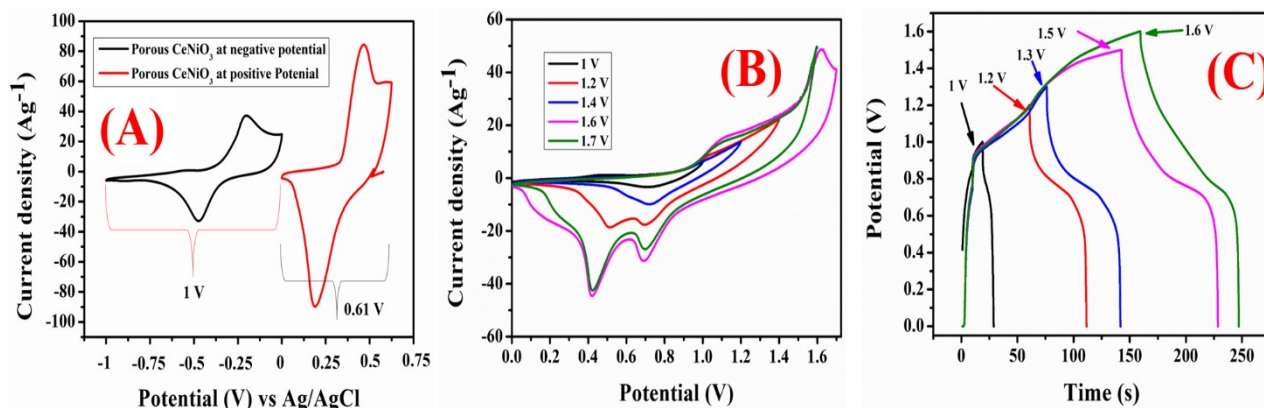

**Fig. S7.** (A) The operating potential window of CNO3 electrode in negative and positive potential at a scan rate of 70 mVs<sup>-1</sup> (B) CV at different potential at a scan rate of 150 mVs<sup>-1</sup> (C) GCD at different potential at a current density of 2.5 Ag<sup>-1</sup>.

**Table S2.** Electrochemical performances of different perovskite oxides

| Sl. No. | Electrode material | Synthesis Method        | Electrolyte | Specific capacity/<br>capacitance | Surface area                        | Scan rate/Current density | Energy density           | Power density            | Cyclic stability                                          | Reference |
|---------|--------------------|-------------------------|-------------|-----------------------------------|-------------------------------------|---------------------------|--------------------------|--------------------------|-----------------------------------------------------------|-----------|
| 1       | SrTiO <sub>3</sub> | Sol-gel                 | 3 M KOH     | 590 Fg <sup>-1</sup>              | 50.4 m <sup>2</sup> g <sup>-1</sup> | 5 mVs <sup>-1</sup>       | 27.8 Wh kg <sup>-1</sup> | 303.3 W kg <sup>-1</sup> | 99% retention after 5000 GCD cycles at 5 Ag <sup>-1</sup> | [1]       |
| 2       | SrCoO <sub>3</sub> | EDTA-citric acid method | 6 M KOH     | 572 Fg <sup>-1</sup>              | 1.53 m <sup>2</sup> g <sup>-1</sup> | 1 Ag <sup>-1</sup>        | 27.5 Wh kg <sup>-1</sup> | 750 W kg <sup>-1</sup>   | Reached to maximum capacitance in 3500 cycles,            | [2]       |



|   |                                |                                     |                                          |                      |                                   |                    |                              |                             |                                                                                                    |     |
|---|--------------------------------|-------------------------------------|------------------------------------------|----------------------|-----------------------------------|--------------------|------------------------------|-----------------------------|----------------------------------------------------------------------------------------------------|-----|
|   |                                |                                     |                                          |                      |                                   |                    |                              |                             | retains 87.4%<br>after 5000<br>GCD cycles<br>at 1 Ag <sup>-1</sup>                                 |     |
| 3 | LaMnO <sub>3</sub>             | Chemical<br>precipitation<br>method | 0.5 M<br>Na <sub>2</sub> SO <sub>4</sub> | 520 Fg <sup>-1</sup> | 18 m <sup>2</sup> g <sup>-1</sup> | 1 Ag <sup>-1</sup> | 52.5 Wh<br>kg <sup>-1</sup>  | 1000 W<br>kg <sup>-1</sup>  | Retains<br>117% of its<br>initial<br>capacitance<br>after 7500<br>cycles at 10<br>Ag <sup>-1</sup> | [3] |
| 4 | LaMnO <sub>3</sub><br>(Porous) | Sol-gel<br>combustion<br>method     | 0.5 M<br>Na <sub>2</sub> SO <sub>4</sub> | 580 Fg <sup>-1</sup> |                                   | 1 Ag <sup>-1</sup> | 43.55 Wh<br>kg <sup>-1</sup> | 770.5 W<br>kg <sup>-1</sup> | Retains<br>135% of its<br>initial<br>capacitance<br>10 Ag <sup>-1</sup>                            | [4] |

|   |                                   |                            |                                     |                           |                                      |                     |                           |                          |                                                                  |     |
|---|-----------------------------------|----------------------------|-------------------------------------|---------------------------|--------------------------------------|---------------------|---------------------------|--------------------------|------------------------------------------------------------------|-----|
| 5 | LaMnO <sub>3-d</sub>              | Reverse-phase hydrolysis   | 6 M KOH                             | 609.8 Fg <sup>-1</sup>    | 10.6 m <sup>2</sup> g <sup>-1</sup>  | 2 mVs <sup>-1</sup> | 220.4 Wh kg <sup>-1</sup> | 61.2 W kg <sup>-1</sup>  |                                                                  | [5] |
| 6 | LaNiO <sub>3</sub><br>(2D sheets) | Sol-gel                    | 6 M KOH                             | 139.2 mAh g <sup>-1</sup> | 181.2 m <sup>2</sup> g <sup>-1</sup> | 1 Ag <sup>-1</sup>  | 65.84 Wh kg <sup>-1</sup> | 1800 W kg <sup>-1</sup>  | 92.39% retention after 10,000 CV cycles at 150 mVs <sup>-1</sup> | [6] |
| 7 | LaCoO <sub>3</sub>                | Urea combustion            | 6 M KOH                             | 706.9 Fg <sup>-1</sup>    |                                      | 1 Ag <sup>-1</sup>  | 47.64 Wh kg <sup>-1</sup> | 804.4 W kg <sup>-1</sup> | 96% retention after 4000 GCD cycles at 5 A g <sup>-1</sup>       | [7] |
| 8 | LaFeO <sub>3</sub>                | MOF derived using template | 1 M Na <sub>2</sub> SO <sub>4</sub> | 241.3 Fg <sup>-1</sup>    | 41 m <sup>2</sup> g <sup>-1</sup>    | 1Ag-1               | 34 Wh kg <sup>-1</sup>    | 900 W kg <sup>-1</sup>   | 92.2% retention after 5000 GCD cycles                            | [8] |

|    |                    |                         |         |                      |                                           |        |                           |                        |                                                                                     |                  |
|----|--------------------|-------------------------|---------|----------------------|-------------------------------------------|--------|---------------------------|------------------------|-------------------------------------------------------------------------------------|------------------|
|    |                    |                         |         |                      |                                           |        |                           |                        | at 10 A g <sup>-1</sup>                                                             |                  |
| 9  | CeNiO <sub>3</sub> | Co-precipitation        | 3 M KOH | 399 Cg <sup>-1</sup> | 24.83 m <sup>2</sup> g <sup>-1</sup><br>1 | 1 Ag-1 | 27 Wh kg <sup>-1</sup>    | 826 W kg <sup>-1</sup> | Capacity retention of 92% for 5000 cycles at current density of 10 Ag <sup>-1</sup> | [9]              |
| 10 | CeNiO <sub>3</sub> | Sol-gel auto combustion | 3 M KOH | 605 Cg <sup>-1</sup> | 56.58 m <sup>2</sup> g <sup>-1</sup><br>1 | 1 Ag-1 | 43.45 Wh kg <sup>-1</sup> | 800 W kg <sup>-1</sup> | 114.21 % initial capacity retention after 50000 cycles at a current density 25      | <b>This Work</b> |

|  |  |  |  |  |  |  |  |  |                  |  |
|--|--|--|--|--|--|--|--|--|------------------|--|
|  |  |  |  |  |  |  |  |  | Ag <sup>-1</sup> |  |
|--|--|--|--|--|--|--|--|--|------------------|--|

## Coin cell fabricated

The laboratory prototype supercapattery device in the form of a CR-2032 type coin cell was constructed using porous CeNiO<sub>3</sub> (CNO<sub>3</sub>) as positive and negative electrode, and Whatmann filter paper (150 mm) as the separator. The supercapattery performance was carried out in 3M KOH.

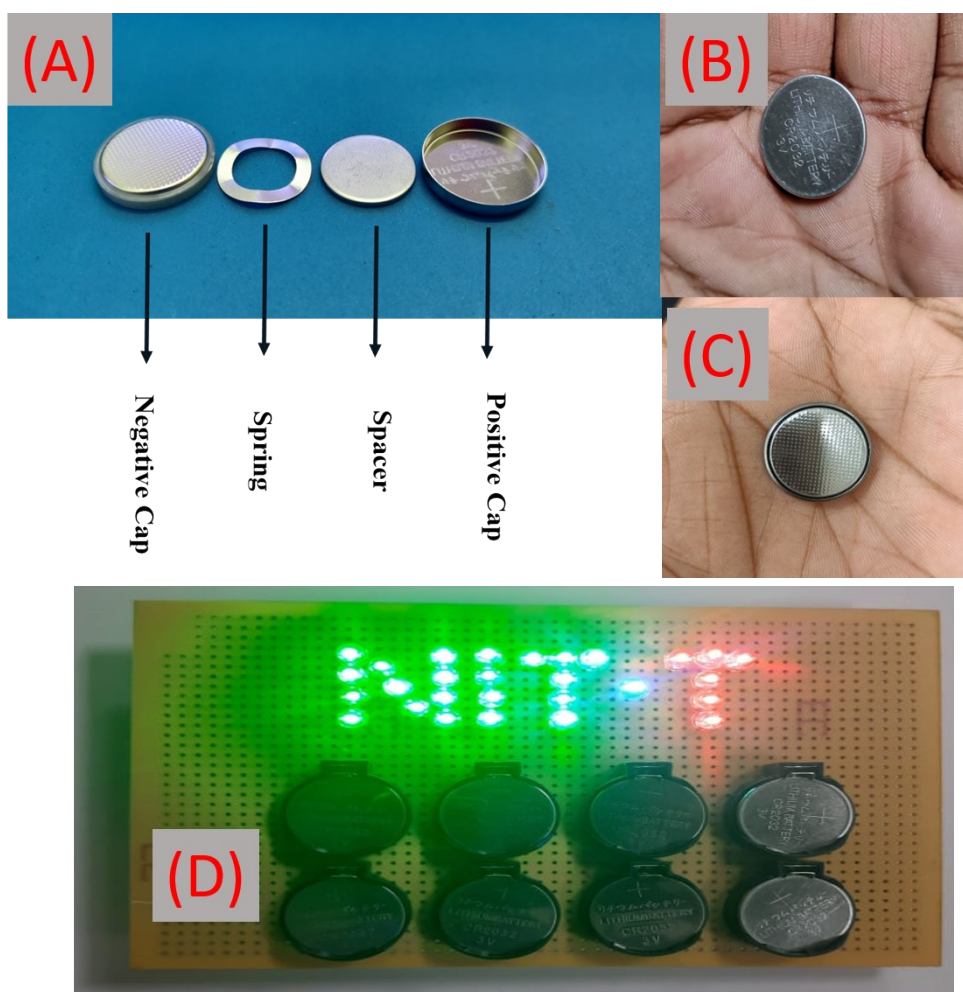

**Fig.S8.** (A) Components of coin cell (B&C) fabricated coin cell (D) illuminating “NITT” using eight (4 for green, 2 for blue and 2 for red) symmetric cell.

## References:

- 1 A. K. Tomar, G. Singh and R. K. Sharma, *J. Power Sources*, 2019, **426**, 223–232.
- 2 Y. Liu, J. Dinh, M. O. Tade and Z. Shao, *ACS Appl. Mater. Interfaces*, 2016, **8**, 23774–23783.
- 3 P. M. Shafi, N. Joseph, A. Thirumurugan and A. C. Bose, *Chem. Eng. J.*, 2018, **338**, 147–156.
- 4 P. M. Shafi, A. C. Bose and A. Vinu, *ChemElectroChem*, 2018, **5**, 3723–3730.
- 5 J. T. Mefford, W. G. Hardin, S. Dai, K. P. Johnston and K. J. Stevenson, *Nat. Mater.*, 2014, **13**, 726–732.
- 6 Z. Li, W. Zhang, H. Wang and B. Yang, *Electrochim. Acta*, 2017, **258**, 561–570.
- 7 G. Guo, K. Ouyang, J. Yu, Y. Liu, S. Feng and M. Wei, *ACS Appl. Energy Mater.*, 2020, **3**, 300–308.
- 8 Y. Zhang, J. Ding, W. Xu, M. Wang, R. Shao, Y. Sun and B. Lin, *Chem. Eng. J.*, 2020, **386**, 124030.
- 9 M. P. Harikrishnan, A. J. C. Mary and A. C. Bose, *Electrochim. Acta*, 2020, **362**, 137095.
